# Supplementary material for: Overcoming Bcr-Abl T315I mutation by combination of GNF-2 and ATP competitors in an Abl-independent mechanism
Source: BMC Cancer. 2012 Nov 27;12:563. doi: 10.1186/1471-2407-12-563 (PMC3561207; doi:10.1186/1471-2407-12-563)
Supplement: Additional file 1 — Effect of GNF-2 and Abl kinase Inhibitors (AKIs) on the proliferation and clonigenicity of Ba/F3 cells.Figure S1: Effect of Imatinib and Dasatinib on the proliferation of Ba/F3 (Blue) and Ba/F3 p185 Bcr-Abl (Red) cells. The cells supplemented with 10 ng/ml of IL-3, were grown for 72 h in the presence of different Imatinib and Dasatinib concentrations. Cells were counted and percent of inhibition was calculated in relation to the solvent (0.5% DMSO) treated samples. Experiments were carried out in duplicates and repeated twice with comparable outcome. Figure S2: Cooperation between GNF-2 with Imatinib and Dasatinib in regulating proliferation of Ba/F3 cells. Ba/F3 supplemented with 10 ng/ml of IL-3 were grown for 72 h in the presence of various GNF-2 concentration (0.1, 0.5, 2.5, 5, 25 and 125 μM) alone or in combination with Imatinib (1 μM) and Dasatinib (50 nM). After 72 h incubation, cells were counted and percent of inhibition was calculated in relation to the solvent (0.5% DMSO) treated samples. Experiments were carried out in duplicates and repeated twice with comparable outcome. Figure S3: Effect of GNF-2 and AKIs on the clonigenicity of Ba/F3 cells. Ba/F3 cells grown on soft agar were treated with solvent (DMSO 0.5%; Un), Imatinib (1 μM), Dasatinib (1 μM), and GNF-2 (5 μM-100 μM) alone or in the presence of either 1 μM Imatinib or 1 μM Dasatinib. Experiments were carried out in duplicates and repeated twice with comparable outcome. [file 1471-2407-12-563-S1.docx]

# Effect of GNF-2 and Abl kinase Inhibitors (AKIs) on the proliferation and clonigenicity of Ba/F3 cells

We tested the ability of Imatinib and Dasatinib to affect the growth of the parental Ba/F3 cells grown in the presence of IL-3 (10 ng/ml). Cells were treated with increasing concentration of Imatinib and Dasatinib for 72 hrs. Percentage of growth inhibition was calculated relative to solvent-treated samples. Data shown in Figure S1 indicated that Imatinib at 5M had very little effect on growth of Ba/F3 cells; more than 90% of the cells were viable. In contrast, Dasatinib was more potent in inhibiting the growth of Ba/F3 cells. Presence of Dasatinib at 2.5 M caused a decrease in cell survival to 65%.

Interestingly, Dasatinib at 50nM and Imatinib at 1M caused minimal proliferation inhibition, of less than 10%, and concentrations were selected to verify cooperation with GNF-2, in affecting proliferation and survivals of Ba/F3 cells.

Data presented in figure S2 showed that Imatinib (1 M) and Dasatinib (50nM) failed to cooperate with GNF-2 in affecting proliferation of Ba/F3 cells. The calculated IC50 of cells treated with GNF-2, in the absence or presence of Imatinib and Dasatinib, was almost identical, of 30 +/- 0.2 M, indicating that no cooperation between GNF-2 and AKIs in controlling the proliferation of the parental Ba/F3 cells was observed.

Next, the ability of GNF-2 to affect clonigenicity of Ba/F3 cells grown in the presence of IL-3 (10ng/ml) was examined. Imatinib and Dasatinib at 1M exhibited minimal effect on clonigenicity of Ba/F3 cells. GNF-2 caused clonigenicity inhibition of Ba/F3, as shown in Figure S3. Moreover, presence of 1M of Imatinib and Dasatinib marginally affected the IC, arguing that no significant cooperation exists between GNF-2 and AKIs in inhibiting the proliferation and clonigenicity of the parental Ba/F3 cells.


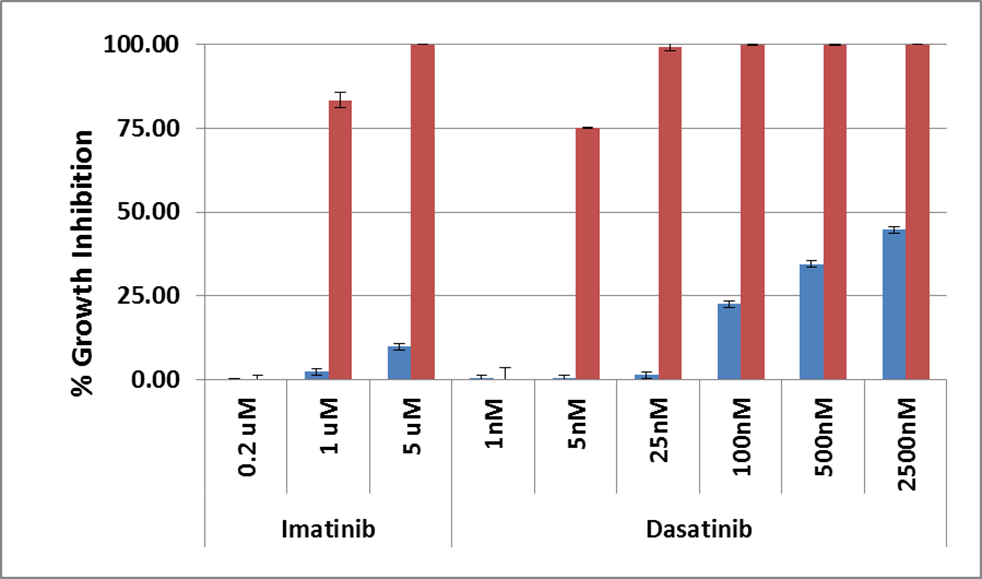


Figure S1: Effect of Imatinib and Dasatinib on the proliferation of Ba/F3 (Blue) and Ba/F3 p185 Bcr-Abl (Red) cells. The cells supplemented with 10 ng/ml of IL-3, were grown for 72 hrs in the presence of different Imatinib and Dasatinib concentrations. Cells were counted and percent of inhibition was calculated in relation to the solvent (0.5% DMSO) treated samples. Experiments were carried out in duplicates and repeated twice with comparable outcome.


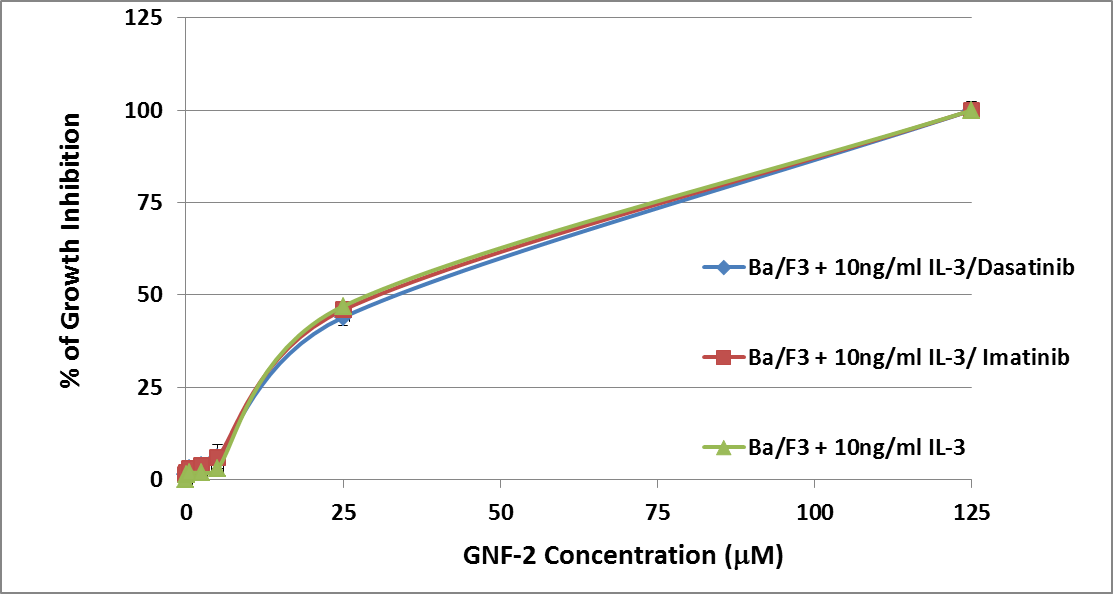


Figure S2: Cooperation between GNF-2 with Imatinib and Dasatinib in regulating proliferation of Ba/F3 cells. Ba/F3 supplemented with 10 ng/ml of IL-3 were grown for 72 hrs in the presence of various GNF-2 concentration (0.1, 0.5, 2.5, 5, 25 and 125 M) alone or in combination with Imatinib (1 M) and Dasatinib (50 nM). After 72 hrs incubation, cells were counted and percent of inhibition was calculated in relation to the solvent (0.5% DMSO) treated samples. Experiments were carried out in duplicates and repeated twice with comparable outcome.

Figure S3: Effect of GNF-2 and AKIs on the clonigenicity of Ba/F3 cells. Ba/F3 cells grown on soft agar were treated with solvent (DMSO 0.5%; Un), Imatinib (1µM), Dasatinib (1µM), and GNF-2 (5µM-100 µM) alone or in the presence of either 1µM Imatinib or 1µM Dasatinib. Experiments were carried out in duplicates and repeated twice with comparable outcome.
